# Supplementary material
Source: publisher figshare collection journal article supplement (https://gsapubs.figshare.com/articles/dataset/_/12093954)
Supplement: Supplementary file 1 [file 1]

Weitao Wang, Peizhen Zhang, Zhicai Wang, Kang Liu, Hongyan Xu, Caicai Liu, Huiping Zhang, Wenjun Zheng, and Dewen Zheng, 2020, Multiproxy records in middle–late Miocene sediments from the Wushan Basin: Implications for climate change and tectonic deformation in the northeastern Tibetan Plateau: GSA Bulletin, <https://doi.org/10.1130/B35635.1>.

## Supplemental Material

**Table S1.** Bulk magnetic susceptibility for the samples collected from the Wushan section in the northeastern Tibetan Plateau.

**Table S2.** Color reference of the bulk samples collected from the Wushan section in the northeastern margin of the Tibetan Plateau

**Table S3.** Lithofacies and interpretations for the Wushan section in the northeastern margin of the Tibetan Plateau

**Table S3.** Lithofacies and interpretations for the Wushan section in the northeastern margin of the Tibetan Plateau

| <b>Code</b> | <b>Description</b>                                                                                 | <b>Interpretation</b>                                                                                  |
|-------------|----------------------------------------------------------------------------------------------------|--------------------------------------------------------------------------------------------------------|
| F1          | Very fine-grained sandstone to siltstone, mudstone with fine lamination                            | Suspension-settling in ponds and lakes                                                                 |
| Fm          | Massive, very fine-grained sandstone to siltstone, mudstone                                        | Suspension settling in lake and overbank deposits                                                      |
| St          | Fine- to very coarse-grained sandstone with trough cross-stratification                            | Migration of large 3D ripples (dunes) under moderately powerful unidirectional flows in large channels |
| Sh          | Fine- to coarse-grained sandstone with plane-parallel lamination                                   | Upper plane bed conditions under unidirectional flows, either strong or very shallow                   |
| Cmm         | Massive, matrix-supported pebble to cobble conglomerate, poorly sorted, disorganized, unstratified | Deposition by cohesive mud-matrix debris flows                                                         |
| Cci         | Pebble to cobble conglomerate, clast-supported, horizontally stratified, imbricated, poorly sorted | Deposition from shallow traction currents in longitudinal bars and gravel sheets                       |
