# Supplementary material
Source: publisher figshare collection journal article supplement (https://gsapubs.figshare.com/articles/dataset/_/12093954)
Supplement: Supplementary file 1 [file 1]

## Sheet: color reference 
Table S2. Color reference of the bulk samples collected from the Wushan section in the northeastern margin of the Tibetan Plateau
Sample	L*(lightness)	a*(redness)	b* (blueness)	a*/L*	Age (Ma)
W543-1	64.9	11	22.9	0.169492	6
W542-1	63.7	11	22.5	0.172684	6.01
WB528	67.7	10.1	20	0.149188	6.03
WB527	64.8	12	23.7	0.185185	6.052
W540-2	61.2	12.3	24	0.20098	6.055
WB526	64.4	10.9	21.5	0.169255	6.079
W538-1	64.1	10.1	22.5	0.157566	6.093
WB524	61.3	13.8	24.2	0.225122	6.097
WB523	62.1	12.9	24.1	0.207729	6.117
W536-3	65.2	10.2	21.5	0.156442	6.12
WB522	64.2	12.4	23.5	0.193146	6.124
WB520	63.7	10.1	20.8	0.158556	6.15
W533-3	64.5	11.4	23.2	0.176744	6.172
W532-2	63	11.1	22.2	0.17619	6.194
WB518	62.7	12.9	23.1	0.205742	6.215
W530-3	63.7	12.4	23.9	0.194662	6.218
WB517	64.9	12.3	23.1	0.189522	6.22
WB516	63.4	9.8	21.1	0.154574	6.239
WB515	62.2	12.7	24.1	0.20418	6.252
W527-2	63.8	11.3	22.8	0.177116	6.268
WB514	62.9	11.7	22.7	0.18601	6.271
WB513	62.5	13.1	24.1	0.2096	6.283
WB512	61.6	11.9	21.8	0.193182	6.296
WB511	60.7	12.3	22.2	0.202636	6.35
WB510	60.3	11.7	22.4	0.19403	6.355
WB509	63.3	10.3	21	0.162717	6.367
W521-2	63.3	8.7	20.3	0.137441	6.407
WB506	65.2	11.1	22	0.170245	6.425
W520-2	68.8	7.6	17.6	0.110465	6.43
WB504	63.1	11.5	22	0.18225	6.466
WB503	66.6	9.5	20.6	0.142643	6.473
W517-1	63	11.5	22.7	0.18254	6.475
WB502	62	11.5	22.8	0.185484	6.491
W515-2	62.2	10.8	21.6	0.173633	6.505
W516-2	69.8	4.1	11.9	0.0587393	6.51
WB500	63.3	11	22	0.173776	6.516
WB499	66.3	6.6	17.1	0.0995475	6.528
W513-2	65.8	8.9	19.3	0.135258	6.53
WB498	60.1	12.9	24.1	0.214642	6.538
WB497	62.1	9.4	20.4	0.151369	6.551
WB496	63.4	10.8	21.8	0.170347	6.557
W510-3	61.5	11.9	22.8	0.193496	6.56
WB495	57.8	13	23.1	0.224913	6.573
W509-1	61.1	12.4	23	0.202946	6.578
WB494	62.7	10.7	21.5	0.170654	6.581
W508-3	64.9	9	20.1	0.138675	6.581
WB493	60.3	11.4	22.5	0.189055	6.598
WB492	62.9	9.2	20.2	0.146264	6.614
WB491	61.3	12.7	23.6	0.207178	6.628
WB490	62.8	10.6	21.3	0.16879	6.638
WB489	63	10.1	21.7	0.160317	6.651
WB488	65.3	9.8	20.2	0.150077	6.659
W502-1	63.7	11	22.3	0.172684	6.663
WB487	58.9	12.5	22.8	0.212224	6.67
WB486	62.5	10.6	21.6	0.1696	6.681
WB485	63	11.4	22.6	0.180952	6.691
W499-1	63.4	9.3	20.7	0.146688	6.7
W498-1	60.5	11.5	22.8	0.190083	6.702
WB484	62.5	11.6	23.2	0.1856	6.703
WB483	62.3	12.1	23.6	0.194222	6.711
WB482	60.7	12.9	23.8	0.212521	6.719
WB481	56.8	14.4	24	0.253521	6.733
W494-3	61.6	11.6	23	0.188312	6.74
WB480	59.2	12.6	23.3	0.212838	6.753
WB479	68.1	9.4	20	0.138032	6.784
WB478	56.6	15	23.2	0.265018	6.795
WB477	60	12.2	22.5	0.203333	6.83
WB476	61.9	13.8	24.2	0.22294	6.848
W489-3	57.1	13.8	23	0.241681	6.874
WB475	64.2	11.5	21.5	0.179128	6.885
W487-1	65.2	6.7	17	0.102761	6.9
WB474	62.3	12.8	23.4	0.205457	6.902
WB473	62.9	12.6	22.2	0.200318	6.928
WB472	61.1	11.9	21.5	0.194763	6.946
WB471	59	13.2	23.1	0.223729	6.963
WB470	64.8	10.3	20.5	0.158951	6.988
WB469	60.6	15.8	25.1	0.260726	7.016
W482-1	64.5	9.9	20.3	0.153488	7.032
W481-3	62.8	11.2	22.1	0.178344	7.044
WB468	61.8	14	23.8	0.226537	7.054
WB467	59.8	15.2	24	0.254181	7.072
W479-1	65.3	7.9	18.5	0.12098	7.085
WB466	61.9	12.1	21.9	0.195477	7.091
W478-2	61.8	10.5	22.2	0.169903	7.124
W477-3	62.3	10.6	21.9	0.170144	7.145
W476-2	57.8	11.7	22	0.202422	7.154
WB463	56.8	14.3	23.5	0.251761	7.164
WB462	65	10.4	20.8	0.16	7.183
WB461	62.6	11.5	21.2	0.183706	7.212
W473-2	62.9	8.7	20	0.138315	7.227
W472-2	61.2	9.7	21.5	0.158497	7.241
W471-3	69.6	8	18	0.114943	7.26165
W470-3	62.3	11.8	22.8	0.189406	7.2789
W469-3	63.3	12.9	23.5	0.203791	7.28936
W468-2	63.2	10.1	21.1	0.15981	7.30451
W467-2	62.6	12.5	23.6	0.199681	7.32751
W466-1	64.6	11	22.5	0.170279	7.34894
W465-1	59.5	11.3	22.5	0.189916	7.36933
W464-3	62.2	11.5	23.6	0.184887	7.38292
W463-2	61.6	11.2	21.4	0.181818	7.4
W462-2	61.3	11.6	22.4	0.189233	7.41689
W461-2	63.6	10.1	20.2	0.158805	7.42787
W460-3	61	11.7	21.1	0.191803	7.454
W459-3	64.2	10.2	20	0.158879	7.5841
W458-3	62.4	12.6	23.8	0.201923	7.61192
W457-2	64.4	10.6	22.1	0.164596	7.642
W456-3	65.2	9.6	20.9	0.147239	7.66123
W455-3	61.4	12	23.4	0.19544	7.6826
W-454-1	61.8	11.2	23	0.18123	7.695
W453-3	67	7.6	16.9	0.113433	7.72069
W451-1	65.9	9.1	21.1	0.138088	7.78985
W450-1	62.1	13.3	24	0.214171	7.82344
W449-2	62.6	13.4	23.5	0.214058	7.861
W448-2	61	12.3	23.3	0.201639	7.89952
W447-1	63.3	9.8	21.6	0.154818	7.93806
W445-1	62.8	13	23.6	0.207006	8.02204
W444-1	65.6	7.8	18	0.118902	8.06749
W443-3	60.8	12.7	23.4	0.208882	8.108
W442-2	60.8	12.9	23.9	0.212171	8.123
W441-2	63.2	11.8	22.3	0.186709	8.14378
W440-2	61.5	13.5	24.5	0.219512	8.19409
W439-2	63.6	10.4	21.2	0.163522	8.221
W438-2	64.7	9	19.3	0.139104	8.32714
W437-1	62.6	9.8	21.2	0.15655	8.3685
W436-1	64.5	11.2	22.6	0.173643	8.41546
W435-1	67.1	7.8	17.1	0.116244	8.44789
W434-2	60.8	11.7	21.5	0.192434	8.48254
W433-3	67.3	8.7	18.5	0.129272	8.51385
W432-3	64.6	10.1	20.8	0.156347	8.58429
W431-2	61.1	12.2	22.6	0.199673	8.61336
W430-2	56.5	13.4	22.9	0.237168	8.65137
W429-2	64	11	21.2	0.171875	8.68826
W428-3	64.7	9.2	19.1	0.142195	8.72069
W427-3	64.7	9.7	19.2	0.149923	8.771
W426-1	64.2	11.8	21.2	0.183801	8.78864
W425-1	67.4	10.9	21.1	0.161721	8.80981
W424-1	59.5	13	24.7	0.218487	8.90389
W423-2	64	9.4	20.7	0.146875	8.92095
W422-3	68.8	7.5	16.4	0.109012	8.94094
W421-2	60	12.5	23.6	0.208333	8.96505
W420-3	58.4	13.7	23.4	0.234589	8.98563
W418-2	60.7	13.2	23.7	0.217463	9.02444
W417-3	59.6	13.4	23.6	0.224832	9.04326
W416-3	61.7	10.7	21.9	0.17342	9.0609
W415-3	65.6	7.4	16.4	0.112805	9.09148
W412-1	60.9	10.3	21.1	0.16913	9.211
W411-1	66.7	5.3	14.2	0.0794603	9.218
W410-2	60.5	12.6	23	0.208264	9.225
W409-1	65.2	10.4	19.8	0.159509	9.232
W408-1	59.5	12.2	21.8	0.205042	9.239
W407-1	59.4	11.8	20.8	0.198653	9.246
W406-3	61.3	11.1	22.5	0.181077	9.253
W405-2	58.3	13	24.2	0.222985	9.311
W404-2	60.9	10.9	21.2	0.178982	9.32474
W403-2	61.3	11.6	22.4	0.189233	9.33965
W402-1	65.3	7.2	18.7	0.11026	9.353
WB390	60.8	14.6	24.5	0.240132	9.367
WB389	61.8	14	23.4	0.226537	9.387
W400-1	62.9	10.4	20.9	0.165342	9.39
WB388	59.7	14.7	24.1	0.246231	9.395
WB387	59.3	14.8	23.5	0.249578	9.414
W398-3	60.2	13.5	24.2	0.224252	9.418
WB386	61.6	14.1	24.1	0.228896	9.426
WB384	60.6	13.7	22.6	0.226073	9.43
WB383	62.3	12.9	22.2	0.207063	9.435
WB380	58.9	15.2	24.2	0.258065	9.44
W396-3	63.6	9.7	20.9	0.152516	9.446
WB379	66.4	8.9	18	0.134036	9.448
W395-2	64.6	8.3	18.8	0.128483	9.46
WB378	60.2	15.4	23.4	0.255814	9.468
W394-1	61.9	11.4	23	0.184168	9.474
WB377	61.2	15	24	0.245098	9.483
WB376	58	14.8	23.6	0.255172	9.497
WB375	59.7	14.8	24	0.247906	9.511
W385-2	57.8	13.6	23.1	0.235294	9.522
WB374	59.5	15.3	24.6	0.257143	9.527
W384-3	58.2	13.5	23	0.231959	9.53
WB373	59.6	15	24.4	0.251678	9.535
W383-1	60.5	11.3	22.9	0.186777	9.54
WB372	60.3	15.2	23.6	0.252073	9.548
W382-1	58.7	12.7	23	0.216354	9.56
WB371	64.7	9.9	19.5	0.153014	9.564
WB370	62.7	13.3	22.8	0.212121	9.575
WB369	62.4	12.7	20.8	0.203526	9.592
W380-2	58.4	13.5	22.7	0.231164	9.601
W379-2	58.8	14	25.1	0.238095	9.603
WB368	62.1	13.7	22.8	0.220612	9.607
WB367	61.8	12.3	21.9	0.199029	9.619
WB366	62.3	11.8	22	0.189406	9.633
WB365	58.9	14.9	22.7	0.252971	9.647
WB364	62.3	14.2	24	0.227929	9.668
WB363	63.7	13.1	22.2	0.205651	9.685
WB362	63.9	12.7	22.6	0.198748	9.705
W373-1	77.1	3	11	0.0389105	9.705
WB361	63.5	13.7	23.1	0.215748	9.725
WC360	63.3	12.9	23.7	0.203791	9.74
WB359	62.2	14.6	23.7	0.234727	9.766
WB358	65.6	10.4	20.5	0.158537	9.782
WB357	62	11.7	20.3	0.18871	9.799
W368-1	62.8	11.5	21.3	0.183121	9.799
W367-2	59.8	13.2	23.8	0.220736	9.814
WC356	62.9	11.5	22.2	0.18283	9.819
W366-3	61.6	13.3	23.2	0.215909	9.825
WB355	61.8	14.9	23.4	0.2411	9.838
WB354	62	15.8	24.3	0.254839	9.855
WB353	62.6	15.9	24.2	0.253994	9.873
WB352	60.4	15.1	23.4	0.25	9.894
W364-2	65.7	11.5	21.1	0.175038	9.905
W363-2	60.7	14.3	23.7	0.235585	9.912
WB351	62.2	13.8	23.5	0.221865	9.915
WB350	60.8	15.2	23.6	0.25	9.933
W361-3	60.4	13	22.9	0.215232	9.95
WB349	63	14.6	24.1	0.231746	9.955
WB348	63.2	13.2	21.2	0.208861	9.975
W359-2	58.9	14.1	23	0.239389	9.99
WB347	60.2	16.6	25.1	0.275748	9.998
W358-2	58.9	15.2	23.5	0.258065	10.014
WB346	55	16.6	24.3	0.301818	10.02
W357-1	65.1	9.3	18.5	0.142857	10.025
WB345	59.2	16.5	25.1	0.278716	10.03
WB344	61.7	14.6	23.3	0.236629	10.057
WB343	62	14.3	23.2	0.230645	10.074
WB342	59.5	14.1	23.3	0.236975	10.091
WB341	63.1	13.2	22.6	0.209192	10.11
WB340	63.6	12.4	22.2	0.194969	10.127
WB336	60.2	14.6	23.4	0.242525	10.1352
W351-3	60	14.2	24.2	0.236667	10.137
WB337	60.6	13.3	22.6	0.219472	10.14
WB339	61.7	13.9	23	0.225284	10.144
WB335	62.3	13.5	23.7	0.216693	10.1522
WB338	61.4	13.5	22.7	0.21987	10.165
WB334	63.5	12.5	22.4	0.19685	10.17
WB333	61.2	12.8	22.4	0.20915	10.187
W344-3	60.7	14.1	24.2	0.23229	10.204
WB331	61.9	13.8	23.2	0.22294	10.221
WB330	60.1	15.7	25.3	0.261231	10.235
WB329	62.4	13.9	23.2	0.222756	10.245
WB328	59.5	14.4	23.2	0.242017	10.269
W340-3	59.9	11.2	21.6	0.186978	10.277
WB327	61.2	9.8	18.3	0.160131	10.287
WB326	73.5	2	9.8	0.0272109	10.315
W339-2	58.9	12.2	22.7	0.207131	10.325
WB325	74.7	-0.7	5.9	-0.00937082	10.335
WB324	55.8	15.6	23.8	0.27957	10.348
W338-1	80.7	-0.8	5.3	-0.00991326	10.358
WB323	74	0.1	6.1	0.00135135	10.377
WB322	57.5	15.5	24.2	0.269565	10.398
WB321	58.5	13.3	23.2	0.22735	10.416
WB320	60.7	12.6	23.4	0.207578	10.428
W333-2	66.6	5.1	15	0.0765766	10.436
WB319	64	9.4	19.8	0.146875	10.447
W332-2	66.3	3.4	12.6	0.0512821	10.457
WB318	65.6	6.2	17.8	0.0945122	10.467
WB317	61	12.3	21.7	0.201639	10.487
WC316	64.9	6.9	15.9	0.106317	10.511
WB315	65.2	6.6	15.3	0.101227	10.528
WB314	83.5	2.7	16	0.0323353	10.538
WB313	61	9.8	19.5	0.160656	10.549
WB312	65.4	6.4	14.1	0.0978593	10.566
WB311	61.8	11.4	21	0.184466	10.583
WB310	59	12.4	22.3	0.210169	10.601
WB309	59.7	9.3	17.3	0.155779	10.618
WB308	64.2	6.9	17.7	0.107477	10.641
WB307	65.7	6	15.1	0.0913242	10.65
WB306	60.1	12.3	22.1	0.204659	10.658
WB305	59.8	12.3	22.2	0.205686	10.677
W319-3	59.3	11.6	22.4	0.195616	10.7
WB304	60.8	12.6	22.8	0.207237	10.71
W318-3	58.2	13.7	23.4	0.235395	10.72
WB303	66.9	6.5	14.1	0.0971599	10.724
W317-3	58.2	14	23.5	0.24055	10.737
WB302	59.5	12.9	22.8	0.216807	10.747
W316-2	63.7	8.7	19.3	0.136578	10.753
WB301	62.4	9.6	18.7	0.153846	10.762
W315-3	60.4	10.6	19.9	0.175497	10.767
WB300	57	19.2	20.3	0.336842	10.777
W314-3	72.5	2.8	10.3	0.0386207	10.782
WB299	59.3	13.2	21.9	0.222597	10.792
WB298	62.7	9	21	0.143541	10.815
WB297	81.6	-0.7	3.8	-0.00857843	10.838
W311-2	61.9	10.7	21.6	0.172859	10.848
WB296	58.9	11.5	20.3	0.195246	10.858
W310-1	58.9	13.7	23.4	0.232598	10.869
WB295	66.6	7.7	16.3	0.115616	10.879
W309-3	61.5	13	23.2	0.211382	10.883
WB294	62.1	11.6	20.6	0.186795	10.899
W308-3	64.2	8.8	19.6	0.137072	10.908
WB293	60.4	12.3	22.2	0.203642	10.919
WB292	55.2	13.5	20.9	0.244565	10.941
WB291	60.1	11.2	20.1	0.186356	10.95
WB290	60.1	12.3	21.9	0.204659	10.967
WB289	66.4	5.1	15.6	0.0768072	10.976
WB288	59.8	8.2	14.2	0.137124	10.996
WB287	62.8	6.4	17.2	0.101911	11.01
W301-2	61.3	8.1	19	0.132137	11.027
W300-3	57.9	13.1	22.8	0.226252	11.039
WB285	60.6	11.3	20.2	0.186469	11.048
WB284	75.1	0.6	7	0.00798935	11.07
WB283	58.1	13.9	21.3	0.239243	11.125
WB281	60.5	10.3	19.9	0.170248	11.188
WC282	69.9	2	20.6	0.0286123	11.21
WB279	65.6	8.7	17.9	0.132622	11.235
W295-3	61.8	8.8	22.2	0.142395	11.284
WB278	69.7	7.4	18.3	0.106169	11.31
WB277	61.3	9	20.9	0.146819	11.348
WB276	57.9	11	20.5	0.189983	11.38
WB275	56.7	12.1	22.9	0.213404	11.4115
WB274	71.7	6.1	14.2	0.0850767	11.45
WB273	62.5	8	19.9	0.128	11.5
WB272	63.5	7.5	19.1	0.11811	11.54
W289-1	65.2	5	18.6	0.0766871	11.569
WB271	62.9	8.1	21	0.128776	11.592
WC269	58.1	11.7	22.1	0.201377	11.606
WB268	62.3	9.6	19.8	0.154093	11.612
WB267	60.7	11.7	20.3	0.192751	11.622
WB266	58	11.8	21.3	0.203448	11.629
W283-1	63.6	6.2	17.5	0.0974843	11.635
WB265	57.9	9.2	18.2	0.158895	11.638
WB264	60.8	9.4	20.2	0.154605	11.642
WB263	57.6	10.4	20.1	0.180556	11.648
W280-1	63.3	5.6	16.1	0.0884676	11.653
WB262	67.5	4.8	8.1	0.0711111	11.657
WB261	62.3	12.1	20.6	0.194222	11.704
W277-1	59.6	10.9	20.8	0.182886	11.725
WB260	57.5	12.3	22.1	0.213913	11.739
WB259	57.9	9.4	17.9	0.162349	11.78
WB258	62.7	9.9	19.9	0.157895	11.82
WB257	58.4	12.3	22.6	0.210616	11.848
WB256	64.8	6.5	19.5	0.100309	11.896
WB255	59	10.8	21.6	0.183051	11.944
W272-3	60.6	9.6	17.9	0.158416	12.01
WB254	62.9	8.2	14.5	0.130366	12.016
WB253	57.5	12.4	20.6	0.215652	12.049
W270-2	75.4	-1.1	5.8	-0.0145889	12.114
WB252	59.9	8.5	17.4	0.141903	12.127
W269-3	64.2	7.3	19.7	0.113707	12.13
WB251	68.1	4.7	16.6	0.0690162	12.151
WB250	62.6	8.6	21.1	0.13738	12.188
WB249	58.1	11.5	20.2	0.197935	12.218
WB248	57.1	11.2	20	0.196147	12.256
WB247	56.5	12.5	24.1	0.221239	12.267
WB246	59.2	10.6	14.7	0.179054	12.318
WB245	61	13.3	22	0.218033	12.349
W262-1	69.3	4.3	15.1	0.0620491	12.37
WB243	61	11.3	18.5	0.185246	12.404
W261-3	62.5	11	20.1	0.176	12.41
WB242	59.5	12.8	23	0.215126	12.416
W259-3	71.8	6.5	13.5	0.0905292	12.44
WB241	68.7	6.7	15.2	0.0975255	12.443
W258-1	63.5	10.3	20	0.162205	12.447
WB240	56.8	12.4	20.4	0.21831	12.474
W257-1	60.9	8.1	19	0.133005	12.484
WB237	61.5	8.3	16.6	0.134959	12.521
WB236	65.5	6.5	15.8	0.0992366	12.535
WB235	59.5	9.4	21.2	0.157983	12.547
WB234	66.3	4.3	17.3	0.0648567	12.556
W250-1	62.2	8.4	20	0.135048	12.56
W251-2	67.1	6.5	17.3	0.0968703	12.565
WB233	59.8	9.8	20	0.16388	12.572
WB232	62.2	9.7	18.1	0.155949	12.59
WB231	85.6	-0.7	2.8	-0.00817757	12.615
WB230	71.2	1.9	7.8	0.0266854	12.63
W246-3	62.4	8.8	20.7	0.141026	12.638
WB229	61.9	8.2	18.9	0.132472	12.643
WB228	72.1	0.7	15	0.00970874	12.6542
WB227	58.5	12.2	17.7	0.208547	12.665
WB226	54.5	12.1	19.8	0.222018	12.68
W244-2	53.6	12.8	21.7	0.238806	12.686
WB225	71.6	0.2	7.6	0.0027933	12.693
WB224	61.5	10.3	21.2	0.16748	12.71
WB223	61.6	10.9	20	0.176948	12.722
WB222	63.7	10.4	21	0.163265	12.735
WB221	63.6	8.4	19.8	0.132075	12.791
WB220	63.5	8.6	17.9	0.135433	12.839
WB219a	60.1	8.9	13.6	0.148087	12.887
W236-1	68.1	5.9	17.1	0.0866373	12.894
WB219	62	9.8	20.9	0.158065	12.899
WB218	63.7	9.7	21.9	0.152276	12.907
W234-1	65.7	6.8	19.2	0.103501	12.912
WB217	63.1	8.2	18.2	0.129952	12.915
WB216	61.5	10	19.8	0.162602	12.924
W233-1	61	9.8	22.8	0.160656	12.934
WB214	61.9	8.3	20.6	0.134087	12.945
WB212	71.8	1.8	9.8	0.0250696	12.964
WB211	65.2	5.1	13.4	0.0782209	12.972
W227-1	63.2	8.2	17.3	0.129747	12.976
WB210	63.3	8.4	17.2	0.132701	12.98
WB209	61.5	9.2	18.6	0.149593	12.992
WB208	59.3	7.2	15.7	0.121417	13.002
WB207	65.6	6.1	15.4	0.0929878	13.01
WB206	62.4	7.3	17.7	0.116987	13.019
W222-1	60.2	10.2	20.9	0.169435	13.022
WB205	73.5	-0.1	6	-0.00136054	13.032
W221-1	62.3	6.6	16.5	0.105939	13.049
W220-3	72	3.8	13.5	0.0527778	13.062
W219A-2	60	11.8	22	0.196667	13.068
WB204	58.7	12.5	21.2	0.212947	13.078
W219-2	61.9	9.6	21.5	0.155089	13.0946
WB203	62.5	9.8	19	0.1568	13.095
WB202	61.4	10.4	20.4	0.169381	13.117
W217-1	60	10	19.5	0.166667	13.122
WB201	62.5	8.3	17.4	0.1328	13.133
WB200	71.2	2.2	9.3	0.0308989	13.152
W215-3	57.7	9.1	18.1	0.157712	13.177
W214-3	60.8	6.7	13.8	0.110197	13.183
WB199	63.5	5.6	12.6	0.088189	13.186
WB198	69.1	-1.5	8	-0.0217077	13.222
WB197	63.1	6.4	14.7	0.101426	13.265
WB196	80.5	-1	4.9	-0.0124224	13.304
WB195	63.2	7.5	17	0.118671	13.317
WB194	60.7	10	18.4	0.164745	13.34
WB193	55.9	11.6	19.8	0.207513	13.363
WB192	70.7	2.8	3.8	0.039604	13.38
W206-1	61.5	8.3	16.3	0.134959	13.387
WB191	61.8	8.5	15.6	0.13754	13.408
W204-2	64.7	8.7	14.8	0.134467	13.43
WB190	64.2	9.2	16.8	0.143302	13.442
W203-1	69.4	7.4	14.6	0.106628	13.446
W198-1	57	14.8	23.1	0.259649	13.45
WB189	60.6	9.3	18.9	0.153465	13.463
W201-1	73.8	6	14.2	0.0813008	13.473
WB188	63.4	10	18.7	0.157729	13.485
WB187	60	12	21.8	0.2	13.514
WB186	65.8	11.5	20	0.174772	13.523
W197-1	59.9	12.5	22.6	0.208681	13.568
WB185	63.8	8.6	17.3	0.134796	13.579
W196-1	63	9.2	17.9	0.146032	13.594
WB184	62	9.6	17.7	0.154839	13.608
WB183	58.6	12.1	20.4	0.206485	13.617
W194-1	70.5	7.1	15.7	0.100709	13.62
W193-3	66.3	7.2	19.1	0.108597	13.625
WB182	59.8	10.1	19.9	0.168896	13.63
W190-3	65.1	8	16.3	0.122888	13.631
W192-3	65.7	9.2	17.2	0.14003	13.64
W191-2	63.6	9.5	18.2	0.149371	13.646
WB181	61.6	20.6	20.6	0.334416	13.65
WB180	61.6	22.6	22.6	0.366883	13.663
WB179	65.8	13.1	13.1	0.199088	13.673
WB178	56.6	22.9	22.9	0.404594	13.68
W187-3	60.4	11.9	21.1	0.19702	13.685
WB177	57.5	12.2	20.7	0.212174	13.696
WB176	60.4	12.8	21.1	0.211921	13.703
WB175	53.4	12.4	20	0.23221	13.719
WB174	54.6	15.2	22.2	0.278388	13.731
WB173	59	12.9	20.9	0.218644	13.739
W181-2	61.2	12.5	20.9	0.204248	13.762
W180-1	61	15.5	24.1	0.254098	13.77
WB172	60.1	15	22.6	0.249584	13.777
W179-3	57.7	14.3	23.7	0.247834	13.789
WB171	59.3	13.1	22.4	0.220911	13.8
WB169	61.9	11.9	22	0.192246	13.833
W178-2	61.9	12.4	21.8	0.200323	13.84
W176-1	60.3	10.1	19.9	0.167496	13.85
WB168	58.7	13.2	21.8	0.224872	13.9
W175-3	66.6	12	21	0.18018	13.916
WB167	63.7	12.2	20.2	0.191523	13.923
WB166	62.3	14.3	23.3	0.229535	13.947
W173-3	62	14.1	22.6	0.227419	13.971
W172-1	58.5	15.4	24.5	0.263248	13.987
WB165	59.8	15.3	23.3	0.255853	14.001
WB164	62.4	15	24.2	0.240385	14.022
W170-3	59.7	15.8	24.5	0.264657	14.043
WB163	61.3	13.7	22.7	0.223491	14.07
W169-2	59.9	16.1	24.6	0.268781	14.079
W168-1	68.3	11.8	21	0.172767	14.085
WB162	67.4	11.3	21.6	0.167656	14.092
W167-1	57.1	13.7	21.1	0.23993	14.099
WB161	61.4	16.3	25.5	0.265472	14.109
W166-2	61.1	17.3	25.9	0.283142	14.112
W165-1	58.8	14	22.1	0.238095	14.125
W161-3	66.5	12.3	20.2	0.184962	14.128
WB160	58.7	16.4	24.8	0.279387	14.133
W164-2	59.7	14.7	22.6	0.246231	14.135
W163-1	54.8	13.7	21.6	0.25	14.155
WB159	58.3	13.9	21.4	0.238422	14.163
W162-3	54.2	15.2	23.4	0.280443	14.173
WB158	68.1	12.1	20.7	0.17768	14.199
W159-1	64.6	12.9	20.8	0.19969	14.235
W160-3	62.7	12.7	20.6	0.202552	14.239
WB157	58.3	14	21.9	0.240137	14.249
WB156	61.9	15.7	24.4	0.253635	14.269
W158-1	64.8	14.4	22.7	0.222222	14.299
W157-1	57.7	15.4	23.1	0.266898	14.319
WB155	55.3	15.4	22.5	0.278481	14.34
W156-2	53.6	16.3	23.8	0.304104	14.35
WB154	59.2	15.9	23.7	0.268581	14.357
W155-3	68.3	12.7	21	0.185944	14.364
WB153	62.4	13.2	21.3	0.211538	14.38
W154-2	72.7	5.3	13.3	0.0729023	14.398
W153-1	68.6	10.6	19.3	0.154519	14.406
WB152	55.7	15.8	22.7	0.283662	14.415
W151-1	66.2	13	20.2	0.196375	14.451
WB151	58.4	16.6	25.2	0.284247	14.457
WB150	69.4	10.3	18.6	0.148415	14.495
W150-1	68.1	12.2	20.4	0.179148	14.5
